# Supplementary material for: Blastobotrys adeninivorans and B. raffinosifermentans, two sibling yeast species which accumulate lipids at elevated temperatures and from diverse sugars
Source: PubMed Central journal article supplement (PMC6587252; doi:10.1186/s13068-019-1492-x), 2019-06-20
Supplement: 13068_2019_1492_MOESM1_ESM.pdf [file 13068_2019_1492_MOESM1_ESM.pdf]

|                 |                   |   |     |                                                  |
|-----------------|-------------------|---|-----|--------------------------------------------------|
|                 |                   |   | 1   | 1                                                |
|                 |                   |   | 230 | 0                                                |
|                 |                   | 1 | 620 | 4                                                |
|                 |                   | 8 | 719 | 0                                                |
| <b>CBS 8244</b> | TTGTCTTAGGACATTTT | / | GTG | /AGCTGGGACCGAGGACTGCGCATCTGCTAGGATGTTGGCGTAATGAC |
| CBS 7350        | A                 | T | GTG | A                                                |
| CBS 7766        | C                 | T | GCG | A                                                |
| <b>LS3</b>      | C                 | - | ACA | T                                                |
| CBS 7370        | C                 | - | ACA | T                                                |
| CBS 7377        | C                 | - | ACA | T                                                |
| CBS 8335        | C                 | - | ACA | T                                                |

**Figure S1. Polymorphisms in the ITS-D1D2 nucleotide sequence.**

For each of the seven strains, a fragment spanning rDNA ITS-D1D2 was PCR-amplified. Their sequences were multi-aligned and restricted to a common fragment of non ambiguous 1086 nt. The sequence of the reference strain (CBS8244<sup>T</sup>) is indicated as follow: it is in extent from nt 1 to 8 and from nt 1040 to 1086; within slashes, only sites of polymorphism are shown with their coordinates at the top, reading downward. SNP are indicated below for other strains, the hyphen representing a single nt deletion.

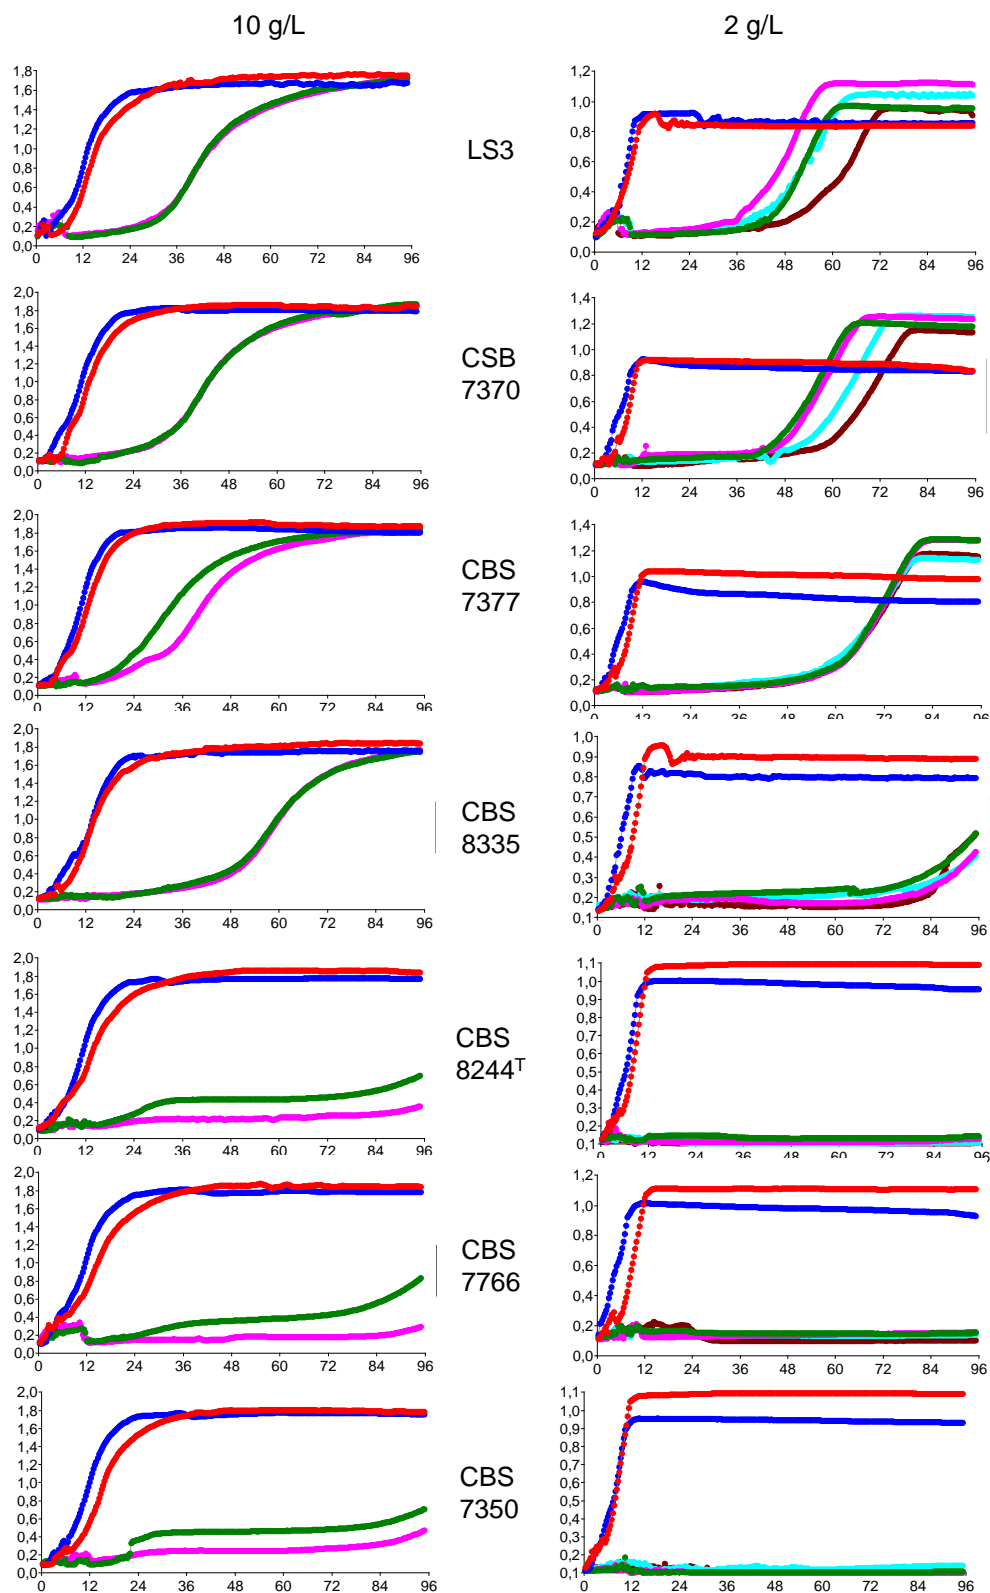

**Figure S2. Growth of *B. adenivorans* and *B. raffinosifermentans* in three different substrates.**

Representative growth curves plotting  $OD_{600}$  against time (h) are shown; several curves were selected for growth in glycerol to give insights into the observed variability. Xylose (red curves), glucose (dark blue curves) and glycerol (other colors) were used at 10 g/L (left panel) or 2 g/L (right panel) to cultivate the 7 strains in 96-well microplates. Upper four strains constitute the group reassigned to *B. raffinosifermentans*. Note that max  $OD_{600}$  cannot be correctly resolved at a concentration of substrate of 10 g/L due to intrinsic limitation of micoplate reader.

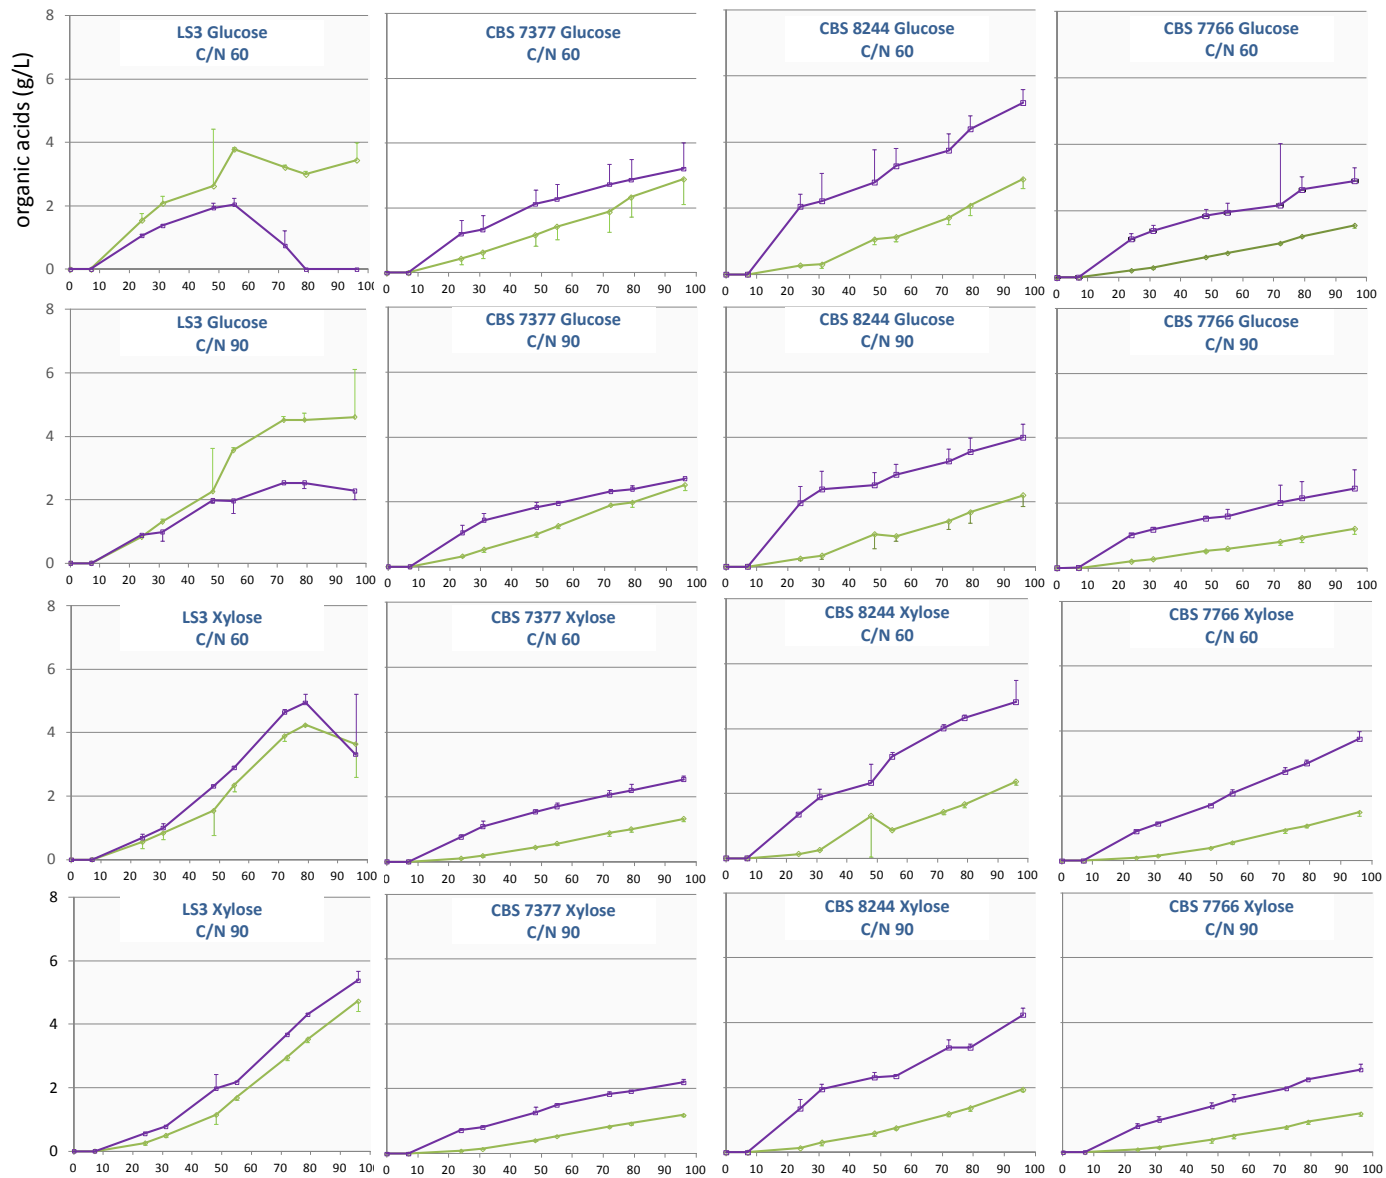

**Figure S3. Organic acids excreted in lipogenic culture conditions.**

The indicated strains were grown in 30 g/L glucose or xylose at two C/N ratios. The concentration of acetic acid (purple line) and citric acid (green line) in culture supernatants (average values and standard deviations, n=3) is plotted over time (h).

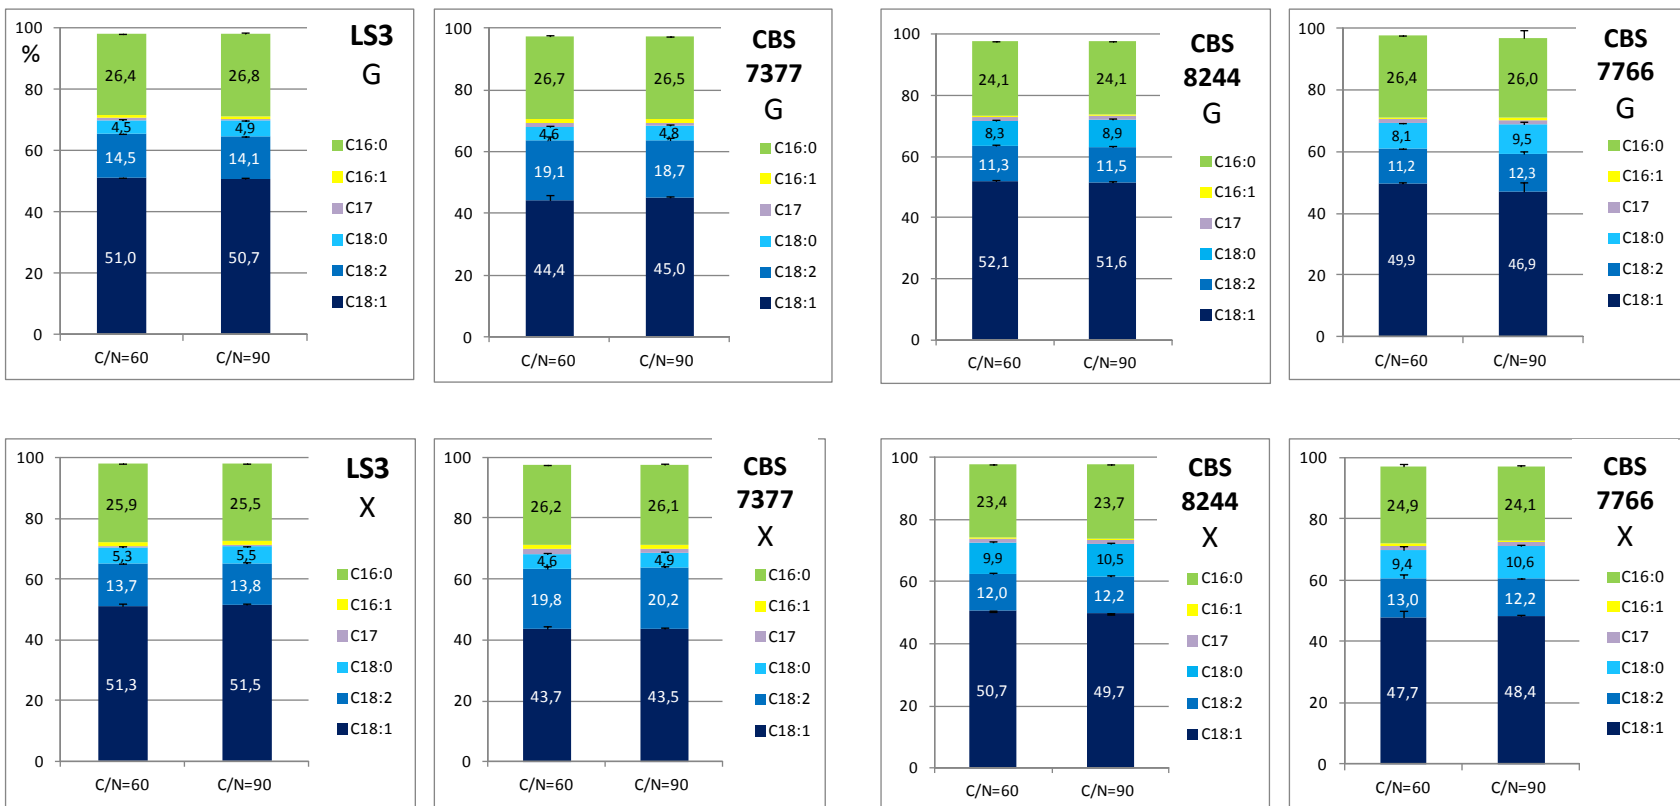

**Figure S4. FA composition of strains of *B. raffinosifermentans* and *B. adenivorans* after growth in lipogenic medium.** The indicated strains were grown for 96h in 30 g/L glucose (G) or xylose (X) at two C/N ratios. The proportion of the different FAs is given in percentage of the total FA fraction.

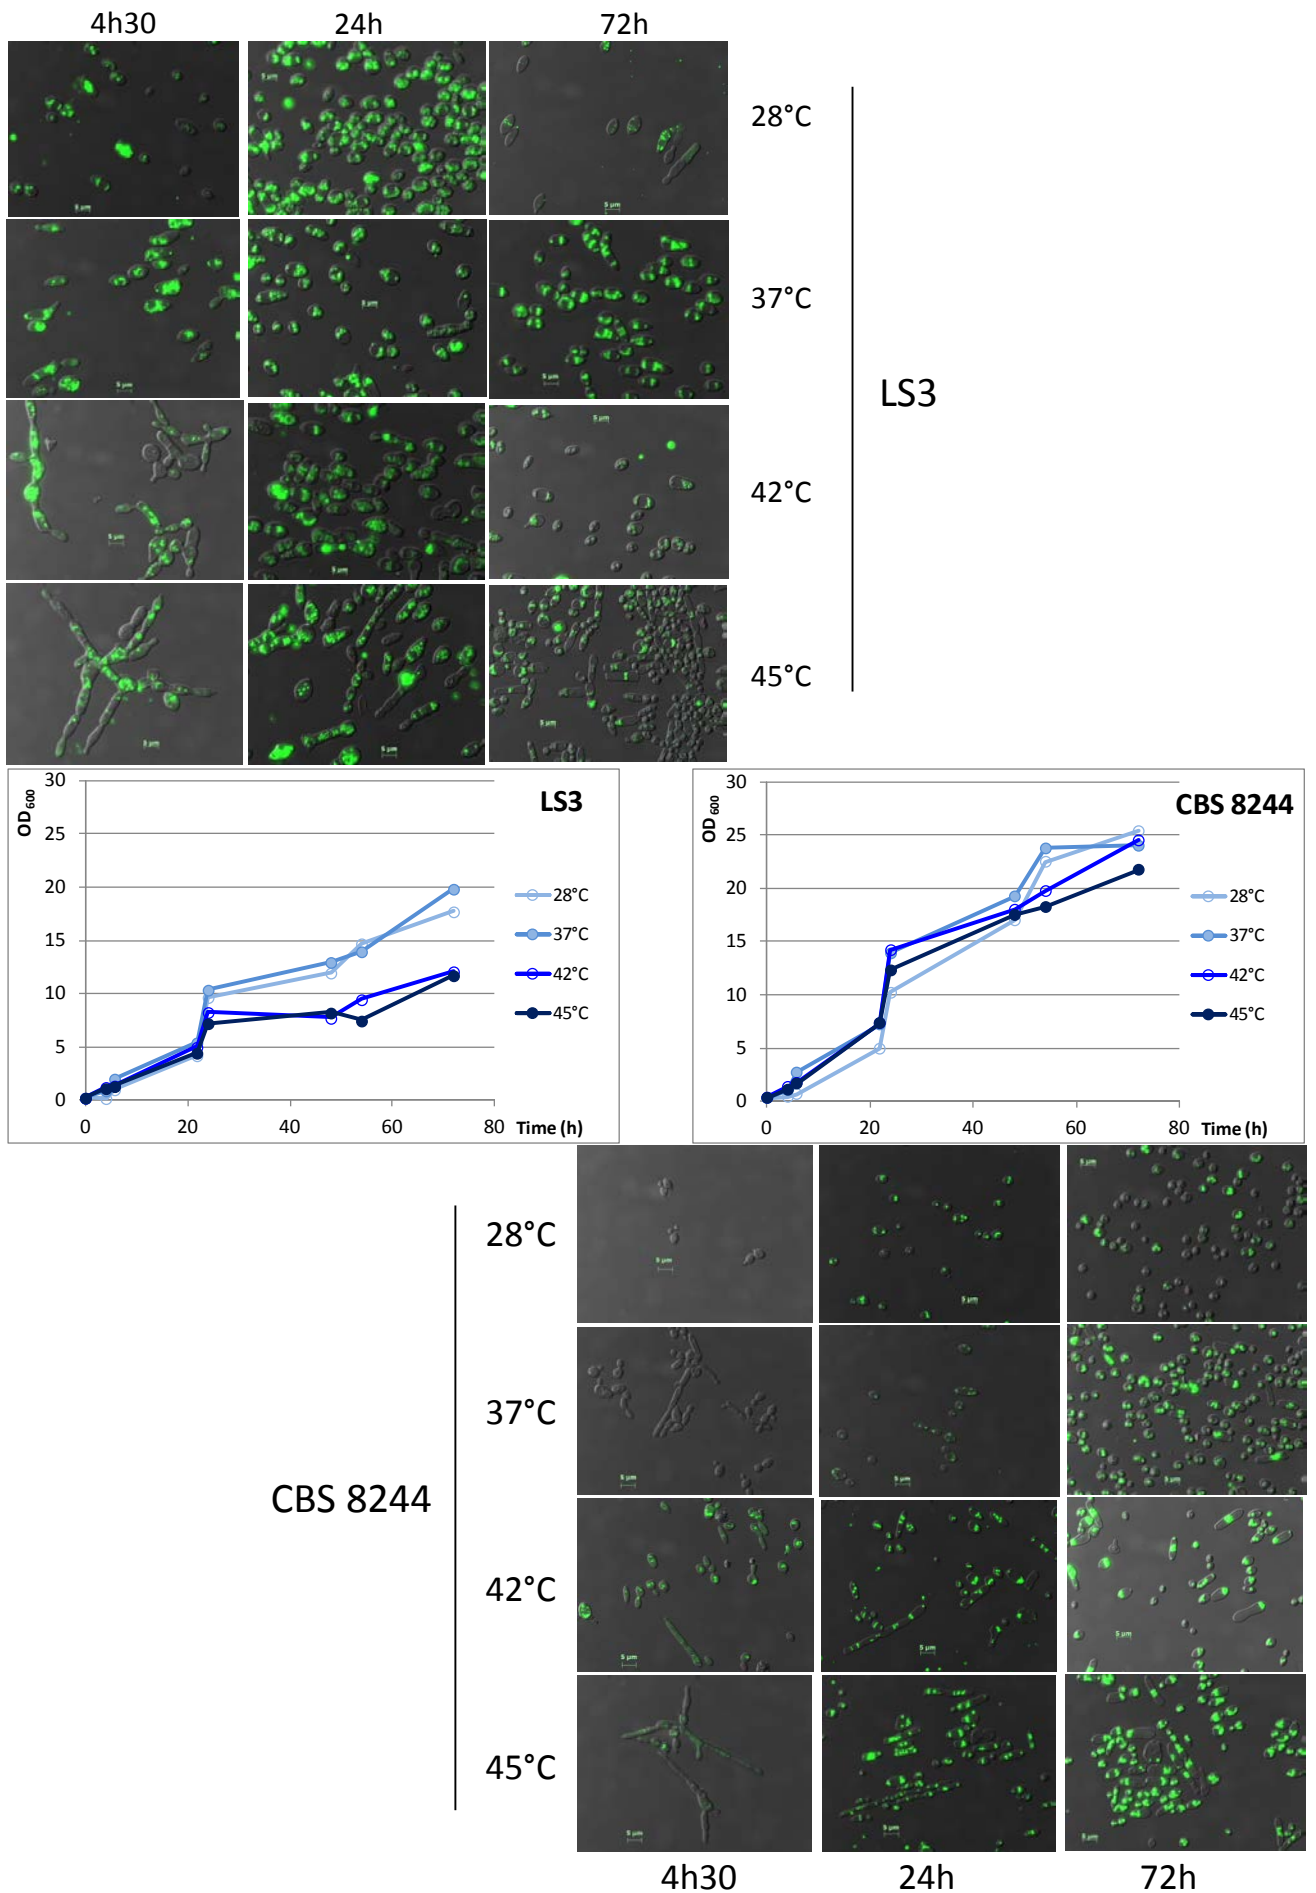

**Figure S5. Growth curves and microscope images of strains LS3 and CBS 8244<sup>T</sup> cultured in glucose lipogenic medium at various temperatures. Neutral lipids were colored with BODIPY.**

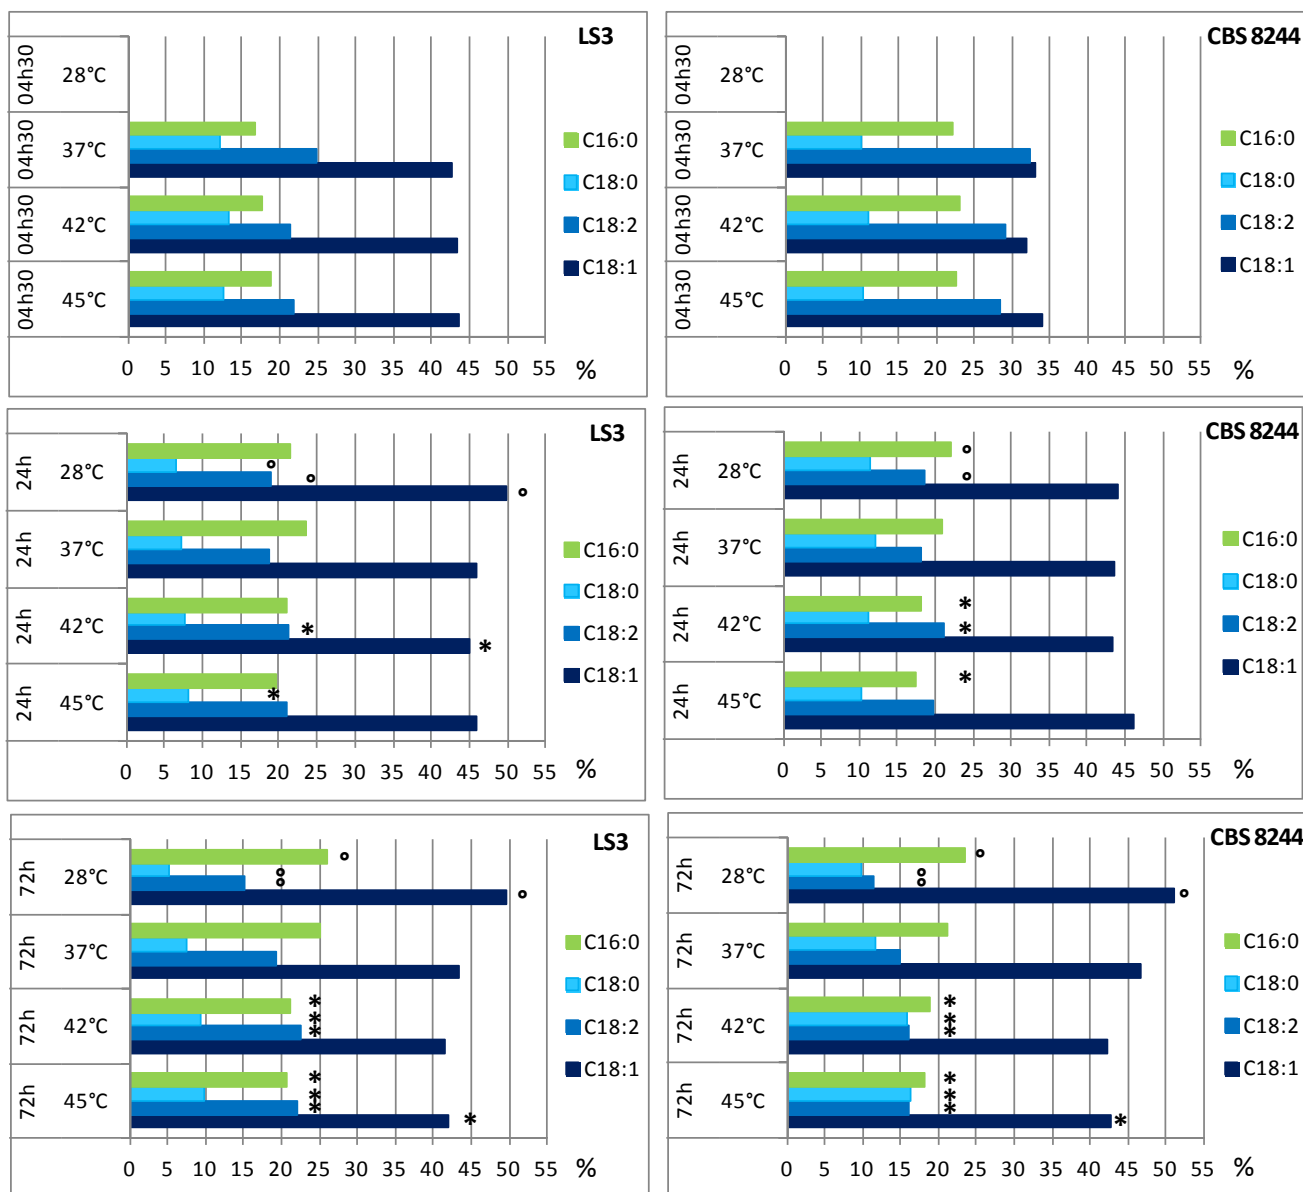

**Figure S6. Relative FA composition of strains LS3 and CBS 8244<sup>T</sup> at various times and temperatures of cultivation in glucose lipogenic medium.**

Percentage of total FA fraction (average values,  $n \geq 3$ ) is represented as a color bar for each of the four main FAs. See Table S3 for complete data. (\*) Indicates significant difference for each FA relative to the reference sample at 28°C (°) in a Kruskal&Wallis test ( $P < 0.05$ ).
