# Supplementary material for: Blastobotrys adeninivorans and B. raffinosifermentans, two sibling yeast species which accumulate lipids at elevated temperatures and from diverse sugars
Source: PubMed Central journal article supplement (PMC6587252; doi:10.1186/s13068-019-1492-x), 2019-06-20
Supplement: 13068_2019_1492_MOESM2_ESM.pdf [file 13068_2019_1492_MOESM2_ESM.pdf]

Table S1. Relative composition (%) of the FA fraction of LS3 cells after growth in various substrates.

| Substrate   | Time | Lipid content<br>(% DCW) | C18:1      | C16:0      | C18:2       | C18:0     | Other<br>FAs |
|-------------|------|--------------------------|------------|------------|-------------|-----------|--------------|
| Cellobiose  | 72h  | 34.8 ± 1.2               | 45.1 ± 0.6 | 28.1 ± 0.2 | 16.8 ± 0.4  | 6.1 ± 0.1 | 3.8 ± 0.1    |
|             | 96h  | 36.6 ± 0.5               | 45.5 ± 0.8 | 27.8 ± 0.0 | 17.1 ± 0.3  | 6.0 ± 0.1 | 3.5 ± 0.5    |
| Glucose     | 72h  | 32.9 ± 1.2               | 48.8 ± 0.4 | 27.4 ± 0.3 | 14.7 ± 0.22 | 5.4 ± 0.3 | 3.7 ± 0.2    |
|             | 96h  | 34.7 ± 0.5               | 48.5 ± 0.3 | 27.4 ± 0.3 | 15.0 ± 0.1  | 5.3 ± 0.3 | 3.9 ± 0.2    |
| Sucrose     | 72h  | 30.7 ± 2.2               | 49.6 ± 1.5 | 26.4 ± 0.1 | 14.7 ± 1.23 | 5.4 ± 0.1 | 3.9 ± 0.3    |
|             | 96h  | 32.3 ± 3.9               | 49.2 ± 1.2 | 26.5 ± 0.1 | 14.9 ± 1.1  | 5.1 ± 0.1 | 4.3 ± 0.2    |
| Fructose    | 72h  | 31.9 ± 0.2               | 51.3 ± 0.5 | 26.1 ± 0.1 | 13.8 ± 0.5  | 5.3 ± 0.1 | 3.4 ± 0.1    |
|             | 96h  | 32.2 ± 0.9               | 50.0 ± 1.0 | 25.9 ± 0.1 | 14.1 ± 0.3  | 5.3 ± 0.1 | 4.6 ± 0.7    |
| L-arabinose | 72h  | 27.3 ± 1.1               | 44.0 ± 0.1 | 26.7 ± 0.4 | 19.7 ± 0.0  | 4.5 ± 0.1 | 5.1 ± 0.6    |
|             | 96h  | 30.1 ± 0.6               | 48.0 ± 3.2 | 26.8 ± 0.9 | 16.1 ± 2.3  | 4.9 ± 0.4 | 4.3 ± 0.4    |
| Galactose   | 72h  | 18.6 ± 1.6               | 50.7 ± 0.8 | 25.2 ± 0.1 | 15.3 ± 0.2  | 4.6 ± 0.0 | 4.1 ± 0.6    |
|             | 96h  | 23.1 ± 0.6               | 50.9 ± 0.5 | 25.1 ± 0.2 | 14.7 ± 0.2  | 4.7 ± 0.1 | 4.5 ± 0.0    |
| Starch      | 72h  | 19.3 ± 2.1               | 55.1 ± 0.9 | 21.9 ± 0.5 | 12.1 ± 0.6  | 6.7 ± 0.4 | 4.1 ± 0.4    |
|             | 96h  | 22.0 ± 0.4               | 55.1 ± 0.1 | 21.9 ± 0.1 | 12.1 ± 0.2  | 5.9 ± 0.3 | 4.9 ± 0.1    |
| Glycerol    | 72h  | 13.2 ± 0.3               | 46.1 ± 0.1 | 19.2 ± 0.0 | 22.3 ± 0.4  | 6.3 ± 0.1 | 6.0 ± 0.4    |
|             | 96h  | 16.8 ± 0.4               | 47.3 ± 1.2 | 19.4 ± 0.4 | 20.4 ± 0.7  | 6.0 ± 0.1 | 7.0 ± 2.3    |

Average values and mean deviations (n=2) are indicated.

Cells were cultivated in N-limited YNB-based media for the indicated time.

Table S2. Final yields after 72 h of cultivation of LS3 and CBS 8244<sup>T</sup> in YNB-based glucose media (C/N = 60) at different temperatures.

|                             |             | Lipid titer<br>g/L | DCW<br>g/L   | Y <sub>FA/S</sub> | Y <sub>X/S</sub> |
|-----------------------------|-------------|--------------------|--------------|-------------------|------------------|
| <b>LS3</b>                  | <b>28°C</b> | 2.54 ± 0.16        | 9.78 ± 0.10  | 0.080 ± 0.007     | 0.310 ± 0.006    |
|                             | <b>37°C</b> | 3.08 ± 0.49        | 10.00 ± 1.49 | 0.093 ± 0.017     | 0.303 ± 0.053    |
|                             | <b>42°C</b> | 1.51 ± 0.12        | 6.22 ± 0.43  | 0.053 ± 0.004     | 0.218 ± 0.014    |
|                             | <b>45°C</b> | 1.38 ± 0.17        | 5.77 ± 0.34  | 0.048 ± 0.006     | 0.200 ± 0.013    |
| <b>CBS 8244<sup>T</sup></b> | <b>28°C</b> | 1.83 ± 0.28        | 9.62 ± 1.00  | 0.070 ± 0.006     | 0.369 ± 0.027    |
|                             | <b>37°C</b> | 1.76 ± 0.28        | 9.12 ± 1.13  | 0.062 ± 0.007     | 0.322 ± 0.035    |
|                             | <b>42°C</b> | 1.78 ± 0.11        | 9.20 ± 0.91  | 0.056 ± 0.003     | 0.291 ± 0.029    |
|                             | <b>45°C</b> | 1.82 ± 0.17        | 9.32 ± 0.46  | 0.056 ± 0.004     | 0.289 ± 0.011    |

Average values and standard deviations (n = 4)

Table S3. Time course analysis of the FA profiles of strains LS3 and CBS 8244<sup>T</sup> cultivated in YNB-based glucose media (C/N = 60) at various temperatures.

LS3

|             |             | Lipid content<br>(% DCW) | C18:1      | C16:0      | C18:2      | C18:0      | C17:0     | Other<br>FAs | DUS  | C16/C18 |        |
|-------------|-------------|--------------------------|------------|------------|------------|------------|-----------|--------------|------|---------|--------|
| <b>4h30</b> | <b>28°C</b> | 6.2 ± 1.5                | 35.3 ± 0.9 | 19.0 ± 0.5 | 36.5 ± 1.5 | 9.1 ± 0.1  | 0.0       | 0.0          | nd   | nd      | (n=2)* |
|             | <b>37°C</b> | 7.3 ± 1.4                | 42.7 ± 0.7 | 16.8 ± 0.3 | 24.9 ± 4.2 | 12.2 ± 1.9 | 1.0 ± 0.6 | 2.7 ± 1.3    | 0.95 | 0.21    | (n=3)  |
|             | <b>42°C</b> | 8.1 ± 1.8                | 43.4 ± 2.9 | 17.6 ± 0.6 | 21.3 ± 1.3 | 13.3 ± 1.3 | 0.9 ± 0.2 | 3.4 ± 2.9    | 0.89 | 0.23    |        |
|             | <b>45°C</b> | 7.4 ± 1.5                | 43.7 ± 2.7 | 18.7 ± 1.0 | 21.8 ± 0.8 | 12.7 ± 0.5 | 1.0 ± 0.3 | 2.2 ± 1.5    | 0.89 | 0.24    | (n=3)  |
| <b>24h</b>  | <b>28°C</b> | 14.0 ± 1.7               | 49.8 ± 1.3 | 21.4 ± 1.0 | 19.0 ± 0.9 | 6.5 ± 0.3  | 0.5 ± 0.1 | 2.8 ± 0.4    | 0.90 | 0.28    |        |
|             | <b>37°C</b> | 18.0 ± 1.4               | 45.9 ± 0.3 | 23.6 ± 0.9 | 18.8 ± 0.7 | 7.2 ± 0.5  | 0.8 ± 0.1 | 3.7 ± 0.3    | 0.87 | 0.33    |        |
|             | <b>42°C</b> | 16.3 ± 1.6               | 45.0 ± 0.8 | 21.1 ± 0.4 | 21.2 ± 0.6 | 7.7 ± 0.2  | 1.0 ± 0.1 | 4.1 ± 0.9    | 0.91 | 0.29    |        |
|             | <b>45°C</b> | 13.0 ± 0.9               | 46.0 ± 1.2 | 19.8 ± 0.9 | 21.1 ± 0.4 | 8.0 ± 0.1  | 1.0 ± 0.1 | 4.1 ± 0.2    | 0.92 | 0.26    |        |
| <b>72h</b>  | <b>28°C</b> | 26.0 ± 1.7               | 49.6 ± 0.9 | 26.0 ± 0.6 | 15.1 ± 0.3 | 5.2 ± 0.3  | 0.6 ± 0.1 | 3.5 ± 0.1    | 0.83 | 0.37    |        |
|             | <b>37°C</b> | 30.8 ± 0.7               | 43.3 ± 0.6 | 25.1 ± 0.5 | 19.2 ± 0.5 | 7.5 ± 0.2  | 0.9 ± 0.1 | 3.9 ± 0.4    | 0.85 | 0.36    |        |
|             | <b>42°C</b> | 24.3 ± 0.3               | 41.5 ± 0.5 | 21.0 ± 0.2 | 22.4 ± 0.4 | 9.3 ± 0.3  | 1.3 ± 0.2 | 4.4 ± 0.6    | 0.90 | 0.29    |        |
|             | <b>45°C</b> | 23.9 ± 1.6               | 42.1 ± 0.3 | 20.7 ± 0.2 | 22.0 ± 0.2 | 9.7 ± 0.1  | 1.2 ± 0.1 | 4.2 ± 0.3    | 0.90 | 0.38    |        |

CBS 8244<sup>T</sup>

|             |             | Lipid content<br>(% DCW) | C18:1      | C16:0      | C18:2       | C18:0      | C17:0     | Other<br>FAs | DUS  | C16/C18 |        |
|-------------|-------------|--------------------------|------------|------------|-------------|------------|-----------|--------------|------|---------|--------|
| <b>4h30</b> | <b>28°C</b> | 7.1 ± 3.4                | 27.4 ± 2.1 | 28.8 ± 8.9 | 30.1 ± 17.2 | 11.7 ± 3.5 | 0.0       | 2.0 ± 2.8    | nd   | nd      | (n=2)* |
|             | <b>37°C</b> | 4.4 ± 0.8                | 33.1 ± 2.9 | 22.2 ± 0.8 | 32.5 ± 3.1  | 10.1 ± 0.8 | 1.0 ± 0.2 | 1.7 ± 1.6    | 1.00 | 0.29    |        |
|             | <b>42°C</b> | 4.9 ± 1.8                | 31.9 ± 2.6 | 23.0 ± 1.2 | 29.2 ± 6.3  | 10.9 ± 4.6 | 1.2 ± 0.1 | 4.1 ± 3.9    | 0.94 | 0.32    |        |
|             | <b>45°C</b> | 5.1 ± 1.1                | 34.0 ± 2.0 | 22.6 ± 0.4 | 28.6 ± 2.9  | 10.2 ± 1.5 | 1.8 ± 0.7 | 2.9 ± 2.1    | 0.94 | 0.31    |        |
| <b>24h</b>  | <b>28°C</b> | 8.0 ± 1.1                | 44.0 ± 0.4 | 22.0 ± 0.5 | 18.5 ± 0.6  | 11.4 ± 0.3 | 1.1 ± 0.4 | 2.9 ± 0.6    | 0.84 | 0.30    |        |
|             | <b>37°C</b> | 10.4 ± 1.5               | 43.6 ± 0.7 | 21.0 ± 0.8 | 18.0 ± 0.4  | 12.0 ± 0.3 | 1.4 ± 0.3 | 3.9 ± 0.6    | 0.83 | 0.29    |        |
|             | <b>42°C</b> | 9.2 ± 0.3                | 43.3 ± 0.3 | 18.2 ± 0.8 | 21.1 ± 0.8  | 11.2 ± 1.0 | 1.4 ± 0.2 | 4.7 ± 0.8    | 0.90 | 0.24    |        |
|             | <b>45°C</b> | 8.9 ± 0.4                | 46.1 ± 1.5 | 17.4 ± 0.5 | 19.7 ± 0.5  | 10.3 ± 1.5 | 1.2 ± 0.1 | 5.4 ± 0.2    | 0.90 | 0.23    |        |
| <b>72h</b>  | <b>28°C</b> | 19.0 ± 2.4               | 51.0 ± 0.7 | 23.6 ± 0.4 | 11.5 ± 0.5  | 9.8 ± 0.4  | 1.0 ± 0.1 | 3.2 ± 0.2    | 0.76 | 0.33    |        |
|             | <b>37°C</b> | 19.2 ± 1.3               | 46.6 ± 0.3 | 21.1 ± 0.4 | 14.8 ± 0.5  | 11.8 ± 0.2 | 1.5 ± 0.1 | 4.1 ± 0.2    | 0.79 | 0.29    |        |
|             | <b>42°C</b> | 19.5 ± 1.6               | 42.3 ± 0.8 | 18.9 ± 0.4 | 16.2 ± 0.4  | 15.8 ± 0.6 | 1.7 ± 0.1 | 5.1 ± 0.4    | 0.80 | 0.25    |        |
|             | <b>45°C</b> | 19.5 ± 1.5               | 42.7 ± 0.6 | 18.1 ± 0.4 | 16.0 ± 0.4  | 16.3 ± 0.6 | 1.6 ± 0.1 | 5.3 ± 0.3    | 0.76 | 0.24    |        |

\* Tables give average values and standard deviations for n = 4 unless otherwise indicated. The relative proportion (%) of FAs in the profiles as well as index for degree of unsaturation and chain length are indicated. nd, not determined.
